# Supplementary material for: TEF-7A, a transcript elongation factor gene, influences yield-related traits in bread wheat (Triticum aestivum L.)
Source: PubMed Central journal article supplement (PMC4157721; doi:10.1093/jxb/eru306), 2014-07-23

**Table S1 Primer sequences used in this study**

**Table S2 Putative *TaTEF* orthologs in 10 plant species and yeast**

**Table S3 48 Cultivars used for identification of haplotypes**

**Fig. S1 Sequence characterization of *TEF* genes in wheat and other plant species.** A, Gene structure. Boxes represent exons and lines represent introns; B, Multiple sequence alignment of domains; C, A neighbor-joining tree created with full-length protein sequences using the program MEGA5.05.

**Fig. S2 Gene sequence of *TaTEF*.**

**Fig. S3 cDNA sequence of *TaTEF*.**

**Fig. S4 PCR amplification of cDNA in nullisomic-tetrasomic lines of homoeologous group 7.** M, marker; 1, N7AT7B; 2, N7AT7D; 3, N7BT7A; 4, N7BT7D; 5, N7DT7B; 6, N7DT7A; 7, H<sub>2</sub>O.

**Fig. S5 Linkage disequilibrium matrix among pairwise polymorphisms in the promoter region of *TaTEF-7A*.** Different colors represent different levels of LD. The labels on the x-axis are in accordance with the SNP on the y-axis in the same order.

Table S1

| Primer set |         | Primer sequence (5'–3')        | Amplified target                         |
|------------|---------|--------------------------------|------------------------------------------|
| TaTEF-1    | Forward | TGGTTACAAGTTTTGGTTGCTTC        | A genome-specific                        |
|            | Reverse | CAATACCAGAAACATGTAGGTCAG       |                                          |
| TaTEF-2    | Forward | ACCTTCACACGTTTTCTGTTC          | A genome-specific                        |
|            | Reverse | AACATAACCAACCACAGGCTTGAG       |                                          |
| TaTEF-3    | Forward | AGTTGCGGCTGCGCTCTT             | A genome-specific                        |
|            | Reverse | GCACGCCATTTTCTTCTAGA           |                                          |
| TaTEF-4    | Forward | TGAGAATTTCGACGAGAACGA          | 2nd time PCR for marker development      |
|            | Reverse | AGTTGCGGCTGCGCTCTT             |                                          |
| TaTEF-5    | Forward | ATGCACCATCATCATCTTCGAC         | Amplified gene and CDS sequence of TaTEF |
|            | Reverse | GAACCATGGGAAGAGAAAGTC          |                                          |
| TaTEF-6    | Forward | CATCATTTGATGGATTATAACAAT       | TaTEF-7A real-time PCR                   |
|            | Reverse | TGCTCCCATGATTGCAGAA            |                                          |
| TaTEF-7    | Forward | TAAGCCACCACCTAGGAAGA           | TaTEF-7B real-time PCR                   |
|            | Reverse | CCTGGCAGATTTGACAGTTA           |                                          |
| TaTEF-8    | Forward | CATCATTTGATTGATTATAACCAC       | TaTEF-7D real-time PCR                   |
|            | Reverse | TGCTGCCATGATTGCAGAA            |                                          |
| Ta-GUS     | Forward | CGCGGATCCAGTTGCGGCTGCGCTCTGA   | Amplification of promoter fragments      |
|            | Reverse | CCTAGGGGTTCAACTTCTTTTCTTCCTCAA |                                          |
| GAPDHF     | Forward | TTAGACTTGCGAAGCCAGCA           | Endogenous reference for real-time PCR   |
|            | Reverse | AAATGCCCTTGAGGTTTCCC           |                                          |
| At actin   | Forward | CCAACAGAGAGAAGATGACT           | Endogenous references for RT-PCR         |
|            | Reverse | ATGTCTCTTACAATTTCCCG           |                                          |
| AtTEF      | Forward | GATAAGCTTGACACAATCTTTAGTT      | AtTEF RT-PCR                             |
|            | Reverse | TCAGAAGTTATACTTCCTTTTGACA      |                                          |
| TaTEF      | Forward | AGAGAAAGTCAGCTGCTAAGC          | TaTEF RT-PCR                             |
|            | Reverse | ACTCATCGATCCATTCGCT            |                                          |

Table S2

| Species                         | Classification  | Gene name    | Accession no.       |
|---------------------------------|-----------------|--------------|---------------------|
| <i>Brachypodium distachyon</i>  | Monocot         | <i>BdTEF</i> | Bradi1g49230        |
| <i>Oryza sativa</i>             | Monocot         | <i>OsTEF</i> | LOC_Os02g04160      |
| <i>Setaria italica</i>          | Monocot         | <i>SiTEF</i> | Si007649m.g         |
| <i>Zea Mays</i>                 | Monocot         | <i>ZmTEF</i> | GRMZM5G858444       |
| <i>Sorghum bicolor</i>          | Monocot         | <i>SbTEF</i> | Sb10g003710         |
| <i>Arabidopsis thaliana</i>     | eudicot         | <i>AtTEF</i> | AT5G46030.1         |
| <i>Thellungiella halophila</i>  | Eudicot         | <i>ThTEF</i> | Thhalv10001045m.g   |
| <i>Brassica rapa</i>            | Eudicot         | <i>BrTEF</i> | Bra022011           |
| <i>Citrus sinensis</i>          | Eudicot         | <i>CsTEF</i> | orange1.1g034538m.g |
| <i>Physcomitrella patens</i>    | Eudicot         | <i>PpTEF</i> | Pp1s75_70V6         |
| <i>Saccharomyces cerevisiae</i> | Funguis (yeast) | <i>ByTEF</i> | NC_001143           |

Table S3

| Accession | Cultivars      | Genotype |
|-----------|----------------|----------|
| SJZ8      | Shijiazhuang 8 | Hap-7A-3 |
| YZ1       | Yanzhan 1      | Hap-7A-3 |
| S4185     | Shi 4185       | Hap-7A-3 |
| YM18      | Yumai 18       | Hap-7A-3 |
| WM6       | Wenmai 6       | Hap-7A-3 |
| JM47      | Jinmai 47      | Hap-7A-3 |
| SN229     | Shannong 229   | Hap-7A-3 |
| JM8       | Jinmai8        | Hap-7A-3 |
| SM3       | Sumai3         | Hap-7A-3 |
| XKH9      | Xinkehan9      | Hap-7A-3 |
| ZY4       | Zhengyin4      | Hap-7A-3 |
| GS96      | Gansu96        | Hap-7A-3 |
| NY188     | Neixiang 188   | Hap-7A-2 |
| BN6       | Beinong 6      | Hap-7A-2 |
| AM6       | AM6            | Hap-7A-2 |
| PY27      | Pingyang 27    | Hap-7A-2 |
| DFH3      | Dongfanghong3  | Hap-7A-2 |
| GT        | Guangtou       | Hap-7A-2 |
| ZM9023    | Zhengmai 9023  | Hap-7A-1 |
| JXZ       | Jiangxizao     | Hap-7A-1 |
| ND2419    | Nanda 2419     | Hap-7A-1 |
| YD1817    | Yanda 1817     | Hap-7A-1 |
| LM14      | Lumai14        | Hap-7A-1 |
| QCM       | Qiangchangmai  | Hap-7A-1 |
| WSB       | Wangshuibai    | Hap-7A-1 |
| NQ4       | Ningchun 4     | Hap-7A-1 |
| J411      | Jing 411       | Hap-7A-1 |
| CS        | Chinese Spring | Hap-7A-1 |
| LZ953     | Laizhou 953    | Hap-7A-1 |
| BMZ       | Baimaizi       | Hap-7A-1 |
| ZY9507    | Zhongyou 9507  | Hap-7A-1 |
| DBP       | Dabaipi        | Hap-7A-1 |
| XHP       | Xiaohongpi     | Hap-7A-1 |
| DXZ       | Dingxingzhai   | Hap-7A-1 |
| LHM       | Lanhuamai      | Hap-7A-1 |
| DMHM      | Daimanghongmai | Hap-7A-1 |
| ZLDM      | Ziludongmai    | Hap-7A-1 |
| FK2       | Fengkang2      | Hap-7A-1 |
| QM        | Qianmai        | Hap-7A-1 |
| HSB       | Huangshuibai   | Hap-7A-1 |
| BP        | Baipu          | Hap-7A-1 |
| ZXM       | Zaoxiaomai     | Hap-7A-1 |

|      |               |          |
|------|---------------|----------|
| HD6  | Huangdong6    | Hap-7A-1 |
| LY5  | Liyong5       | Hap-7A-1 |
| DQM  | Daqingmang    | Hap-7A-1 |
| OF   | Orofen        | Hap-7A-1 |
| AT   | Atlas 66      | Hap-7A-1 |
| CAXM | Chaoanxiaomai | Hap-7A-1 |

---

Fig. S1

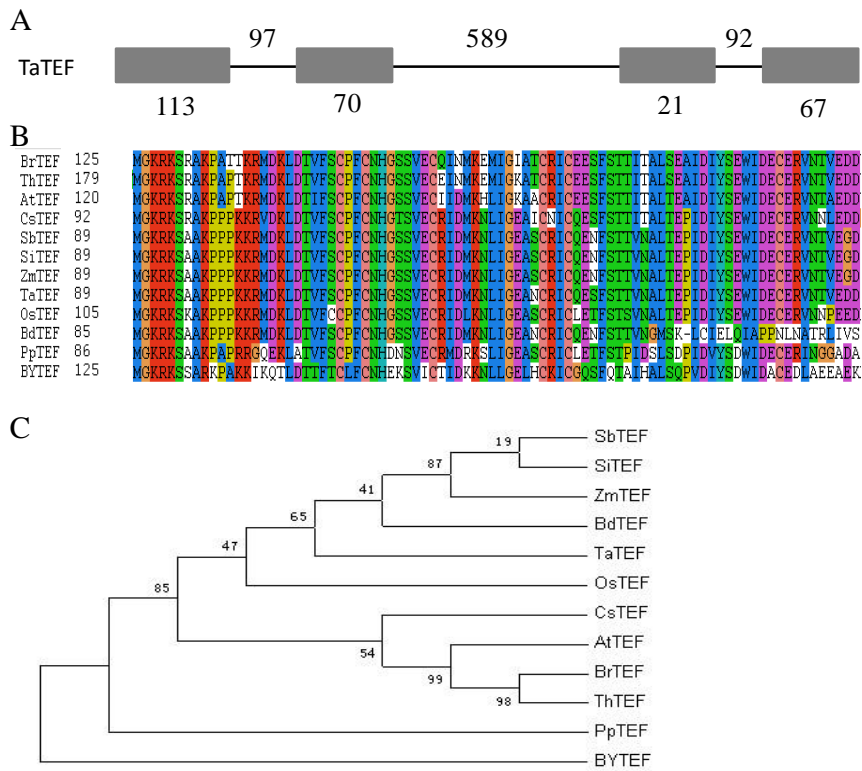

Fig. S2

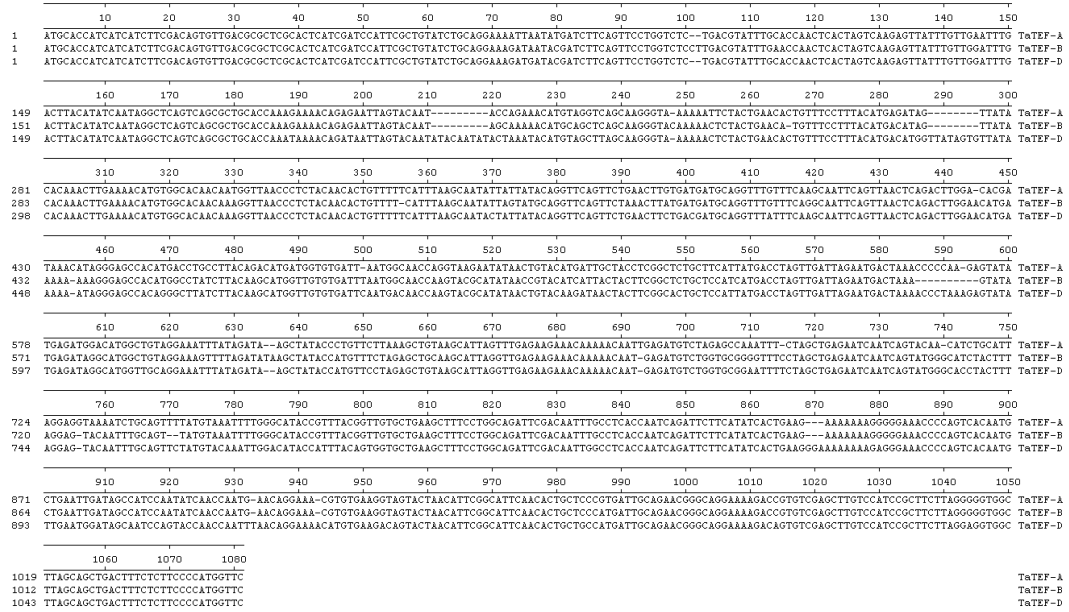

Fig. S3

```
10      20      30      40      50      60      70      80      90
ATGGGGAAGAGAAAAGTCAGCTGCTAAGCCACCCCTAAGAAGCGGATGGACAAGCTCGACACGGTCTTTTCTGCAATCAT A
ATGGGGAAGAGAAAAGTCGGCTGCTAAGCCACCCCTAAGGAAGGGATGGACAAGCTCGACACGGTCTTTTCTGCAATCAT B
ATGGGGAAGAGAAAAGTCAGCTGCTAAGCCACCCCTAAGAAGCGGATGGACAAGCTCGACACGGTCTTTTCTGCAATCAT D

100     110     120     130     140     150     160     170     180
GGGAGCAGTGTGGAATGCCGAATTGATATGAAGAATCTGATTGGTGAGGCCAAATTGTCGAATCTGCCAGGAAAAGCTTCAGCACACCGTA A
GGGAGCAGCGTTGAGTGCCCGATTGATTTGAAGAATCTGATTGGTGAGGCCAAATTGTCGAATCTGCCAGGAAAAGCTTCAGCACACCGTA B
GGCAGCAGTGTGGAATGCCGAATTGATATGAAGAATCTGATTGGTGAGGCCAAATTGTCGAATCTGCCAGGAAAAGCTTCAGCACACCGTA D

190     200     210     220     230     240     250     260     270
AACGCGCTGACTGAGCCTATTGATATATACAGCGAATGGATCGATGAGTGCGAGCGCGTCAACACTGTGCGAAGATGATGATGGTGCATGA A
AATGCGCTGACTGAAACCTATTGATTTATACAGCGAATGGATCGATGAGTGCGAGCGCGTCAACACTGTGCGAAGATGATGATGGTGCATGA B
AATGCGCTGACTGAGCCTATTGATATATACAGCGAATGGATCGATGAGTGCGAGCGCGTCAACACTGTGCGAAGATGATGATGGTGCATGA D
```



Fig. S4

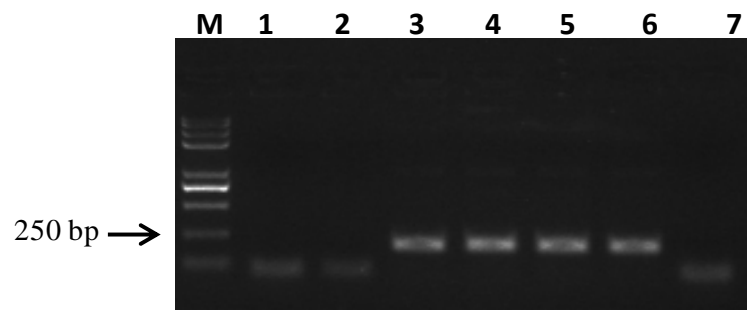

Fig. S5

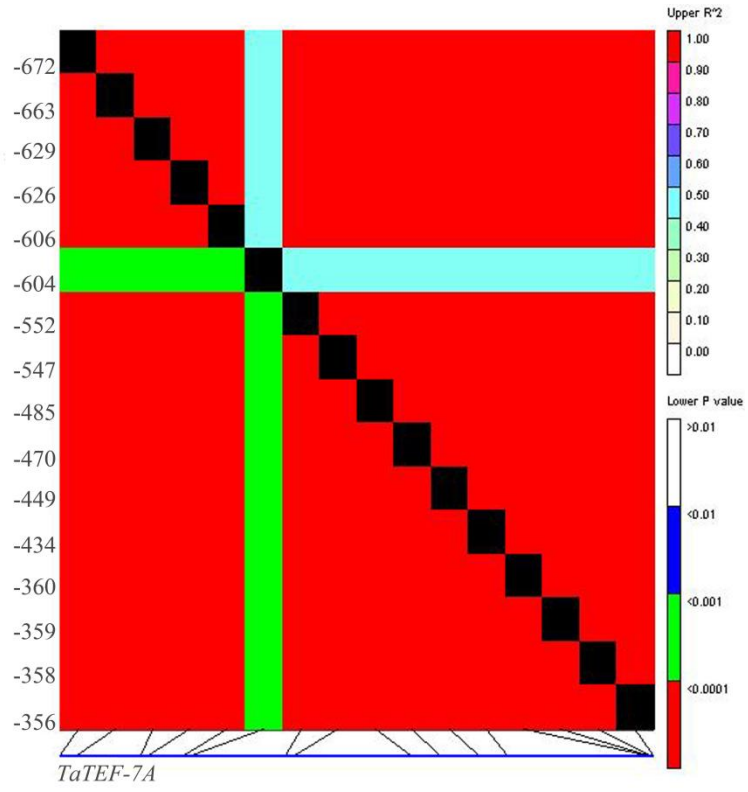

Supplement: supp_eru306_jexbot124495_file001.pdf [file supp_eru306_jexbot124495_file001.pdf]
